# Supplementary material
Source: PubMed Central journal article supplement (PMC2965061)

Type of file: figure

Label: Figure 1

Filename: Fig\_S1.tif

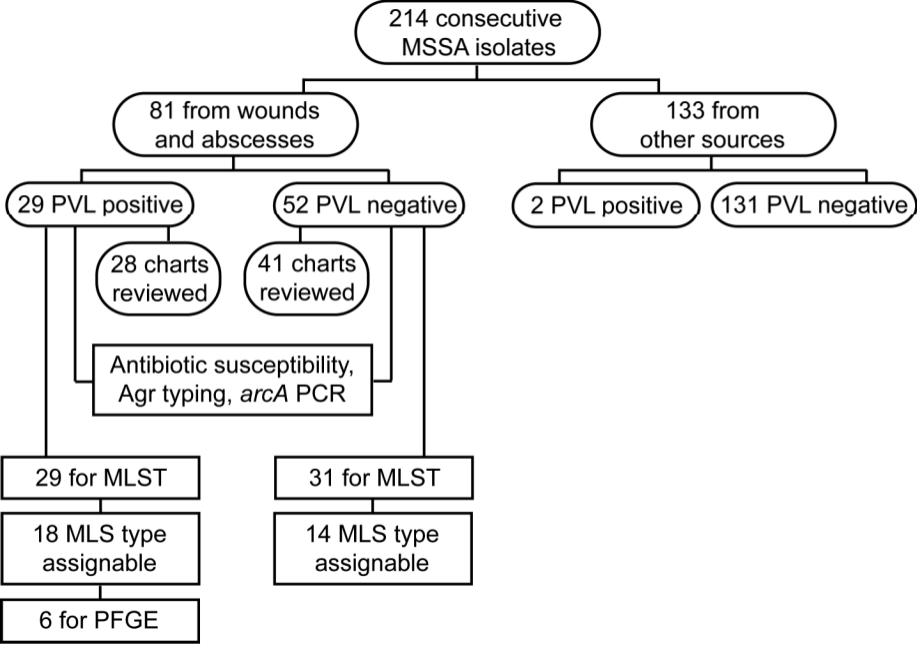

Supplement: NIHMS242462-supplement-supplement_1.pdf [file NIHMS242462-supplement-supplement_1.pdf]
